# Supplementary material
Source: Springer Nature journal article supplement (https://www.springermedizin.de/resource/supplementary/13058_2007_1754_MOESM2_ESM.pdf/9699844)

# Supplementary Figure 1

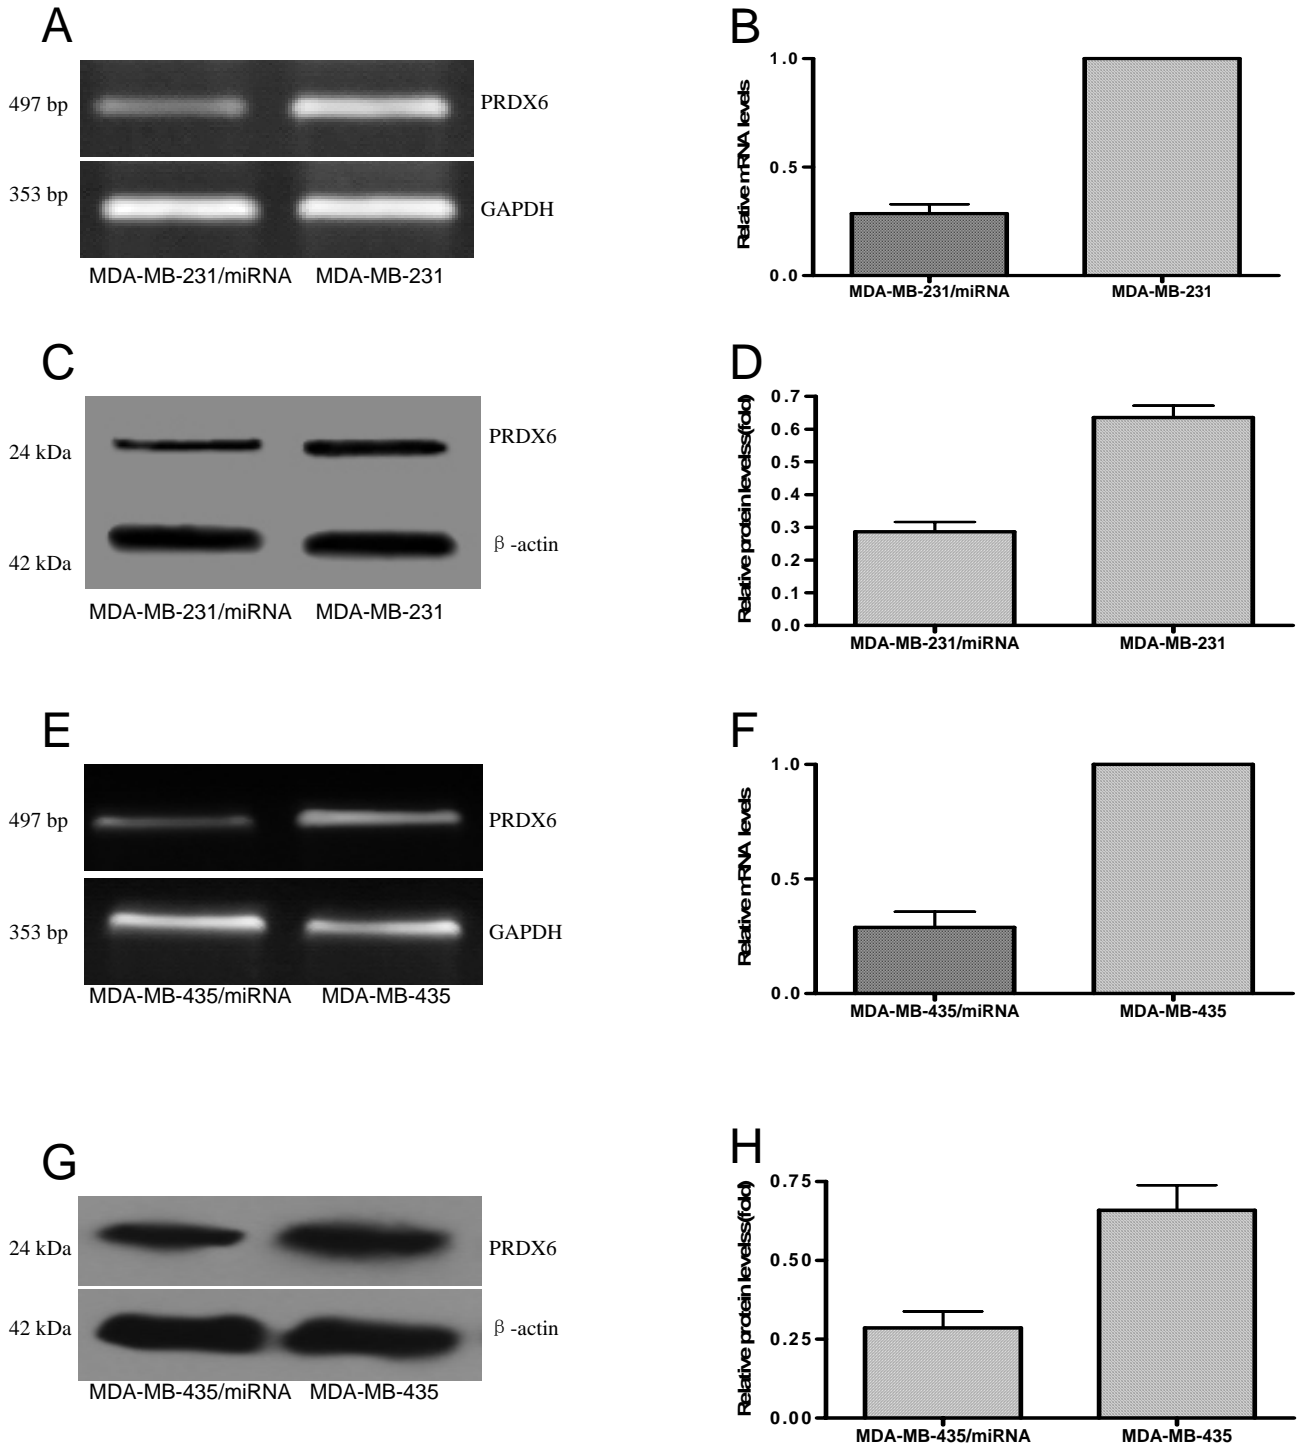

Supplement: MOESM2 [file 9699844]
